# Supplementary material for: Characterization of the complete mitochondrial genome of the Sunda stink-badger (Mydaus javanensis) from the island of Borneo
Source: PeerJ. 2024 Oct 14;12:e18190. doi: 10.7717/peerj.18190 (PMC11485102; doi:10.7717/peerj.18190)
Supplement: Supplemental Information 1 [file peerj-12-18190-s001.xlsx]

## Sheet: Sheet1
Supplementary Data
Table S1: The best partitioning schemes and substitution models were selected by PartitionFinder v2.1.1 for the concatenated PCGs.
Subset	Partitions	Model
1	cox1_pos1, cox3_pos1, nd6_pos1, atp8_pos3, atp8_pos1, cox2_pos1, nd1_pos1, nd4_pos1, nd2_pos1, nd5_pos1, nd3_pos1, cytb_pos1	GTR+I+G
2	nd2_pos2, nd3_pos2, nd5_pos2, atp8_pos2, cox3_pos2, cox2_pos2, nd6_pos2, cox1_pos2, nd4l_pos2, atp6_pos2, nd4_pos2, cytb_pos2, nd1_pos2	GTR+I+G
3	cox1_pos3, cox2_pos3, nd3_pos3, cox3_pos3, nd4_pos3, nd2_pos3, nd1_pos3, cytb_pos3, nd5_pos3	GTR+I+G
4	nd4l_pos1, atp6_pos1	GTR+I+G
5	atp6_pos3, nd4l_pos3	HKY+I+G
6	nd6_pos3	HKY+I+G
