# Supplementary material for: Characterization of the complete mitochondrial genome of the Sunda stink-badger (Mydaus javanensis) from the island of Borneo
Source: PeerJ. 2024 Oct 14;12:e18190. doi: 10.7717/peerj.18190 (PMC11485102; doi:10.7717/peerj.18190)
Supplement: Supplemental Information 2 [file peerj-12-18190-s002.xlsx]

## Sheet: Sheet1
Supplementary Data
Table S2: Nucleotide composition and skewness of the mitogenome in the Sunda stink-badger (Mydaus javenensis).
Regions	T	C	A	G	A-T	A+T	A-T/A+T	G-C	G+C	G-C/G+C
ATP6	30.1	27.5	31.6	10.9	1.5	61.7	0.0243112	-16.6	38.4	-0.432292
ATP8	26.5	23	45.1	5.4	18.6	71.6	0.259777	-17.6	28.4	-0.619718
COI	30.2	24.1	28.5	17.2	-1.7	58.7	-0.0289608	-6.9	41.3	-0.16707
COII	28.1	24.7	34.8	12.4	6.7	62.9	0.106518	-12.3	37.1	-0.331536
COIII	30	26.1	29	14.9	-1	59	-0.0169492	-11.2	41	-0.273171
cytb	27.7	28.4	31.4	12.5	3.7	59.1	0.0626058	-15.9	40.9	-0.388753
ND1	27.7	29.4	31.7	11.2	4	59.4	0.0673401	-18.2	40.6	-0.448276
ND2	28.9	25.4	37.8	7.9	8.9	66.7	0.133433	-17.5	33.3	-0.525526
ND3	29.7	24.5	34	11.8	4.3	63.7	0.0675039	-12.7	36.3	-0.349862
ND4	29.6	26.7	33.7	9.9	4.1	63.3	0.0647709	-16.8	36.6	-0.459016
ND4L	31.3	26.9	29.3	12.5	-2	60.6	-0.0330033	-14.4	39.4	-0.365482
ND5	28.4	25.4	35.6	10.5	7.2	64	0.1125	-14.9	35.9	-0.415042
ND6	21.8	27.5	41.3	9.5	19.5	63.1	0.309033	-18	37	-0.486486
rrnS	23.1	22.6	36.7	17.7	13.6	59.8	0.227425	-4.9	40.3	-0.121588
rrnL	25.7	20	37.3	17	11.6	63	0.184127	-3	37	-0.0810811
PCGs	29.6	25.4	32.4	12.6	2.8	62	0.0451613	-12.8	38	-0.336842
rRNAs-revised	24.7	21	37.1	17.2	12.4	61.8	0.200647	-3.8	38.2	-0.0994764
tRNAs-revised	31.3	16.4	33.3	19	2	64.6	0.0309598	2.6	35.4	0.0734463
Control region	28.1	26	30.4	15.5	2.3	58.5	0.0393162	-10.5	41.5	-0.253012
Whole genome	28	24.9	33.9	13.2	5.9	61.9	0.095315	-11.7	38.1	-0.307087
