# Supplementary material for: Characterization of the complete mitochondrial genome of the Sunda stink-badger (Mydaus javanensis) from the island of Borneo
Source: PeerJ. 2024 Oct 14;12:e18190. doi: 10.7717/peerj.18190 (PMC11485102; doi:10.7717/peerj.18190)
Supplement: Supplemental Information 4 [file peerj-12-18190-s004.xlsx]

## Sheet: Sheet1
Supplementary Data
Table S4: Single nucleotide variant in the cyt b gene of the two Mydaus javanensis samples from the island of Borneo (Sabah, Malaysia) and Java (Indonesia).
	108	159	171	204	274	291	292	381	393	411	420	459	490	492	513	555	624	694	708	813	834	962	963	1000	1001	1035	1051
Mydaus javanensis MJ19 (Borneo Malaysia) OP442081	G	A	A	C	G	C	G	G	C	G	C	T	A	T	C	G	G	A	C	A	C	C	C	G	T	T	G
Mydaus javanensis (Java Indonesia) AB564095	A	G	G	T	A	T	A	A	T	A	T	C	G	C	T	A	A	G	A	G	T	G	T	A	C	C	A
Base position in codon	3	3	3	3	1	3	1	3	3	3	3	3	1	3	3	3	3	1	3	3	3	1	3	1	2	3	1
