# Supplementary material for: Characterization of the complete mitochondrial genome of the Sunda stink-badger (Mydaus javanensis) from the island of Borneo
Source: PeerJ. 2024 Oct 14;12:e18190. doi: 10.7717/peerj.18190 (PMC11485102; doi:10.7717/peerj.18190)
Supplement: Supplemental Information 5 [file peerj-12-18190-s005.xlsx]

## Sheet: Sheet1
Supplementary Data
Table S5: Non-synonymous amino acid that resulted from nucleotide variation at the cyt b gene.
	92	98	164	232	321	334	351
Mydaus javanensis MJ19 (Borneo Malaysia) OP442081	V	V	I	M	T	V	G
Mydaus javanensis (Java Indonesia) AB564095	M	M	V	V	S	T	S
